# Supplementary material
Source: PubMed Central journal article supplement (PMC3113245)
Supplement: mmc1.pdf [file mmc1.pdf]

## Report

### **Genetic Variants at 13q12.12 Are Associated**

### **with High Myopia in the Han Chinese Population**

Yi Shi, Jia Qu, Dingding Zhang, Peiquan Zhao, Qingjiong Zhang, Pancy Oi Sin Tam, Liangdan Sun, Xianbo Zuo, Xiangtian Zhou, Xueshan Xiao, Jianbin Hu, Yuanfeng Li, Li Cai, Xiaoqi Liu, Fang Lu, Shihuang Liao, Bin Chen, Fei He, Bo Gong, He Lin, Shi Ma, Jing Cheng, Jie Zhang, Yiye Chen, Fuxin Zhao, Xian Yang, Yuhong Chen, Charles Yang, Dennis Shun Chiu Lam, Xi Li, Fanjun Shi, Zhengzheng Wu, Ying Lin, Jiyun Yang, Shiqiang Li, Yunqing Ren, Anquan Xue, Yingchuan Fan, Dean Li, Chi Pui Pang, Xuejun Zhang, Zhenglin Yang

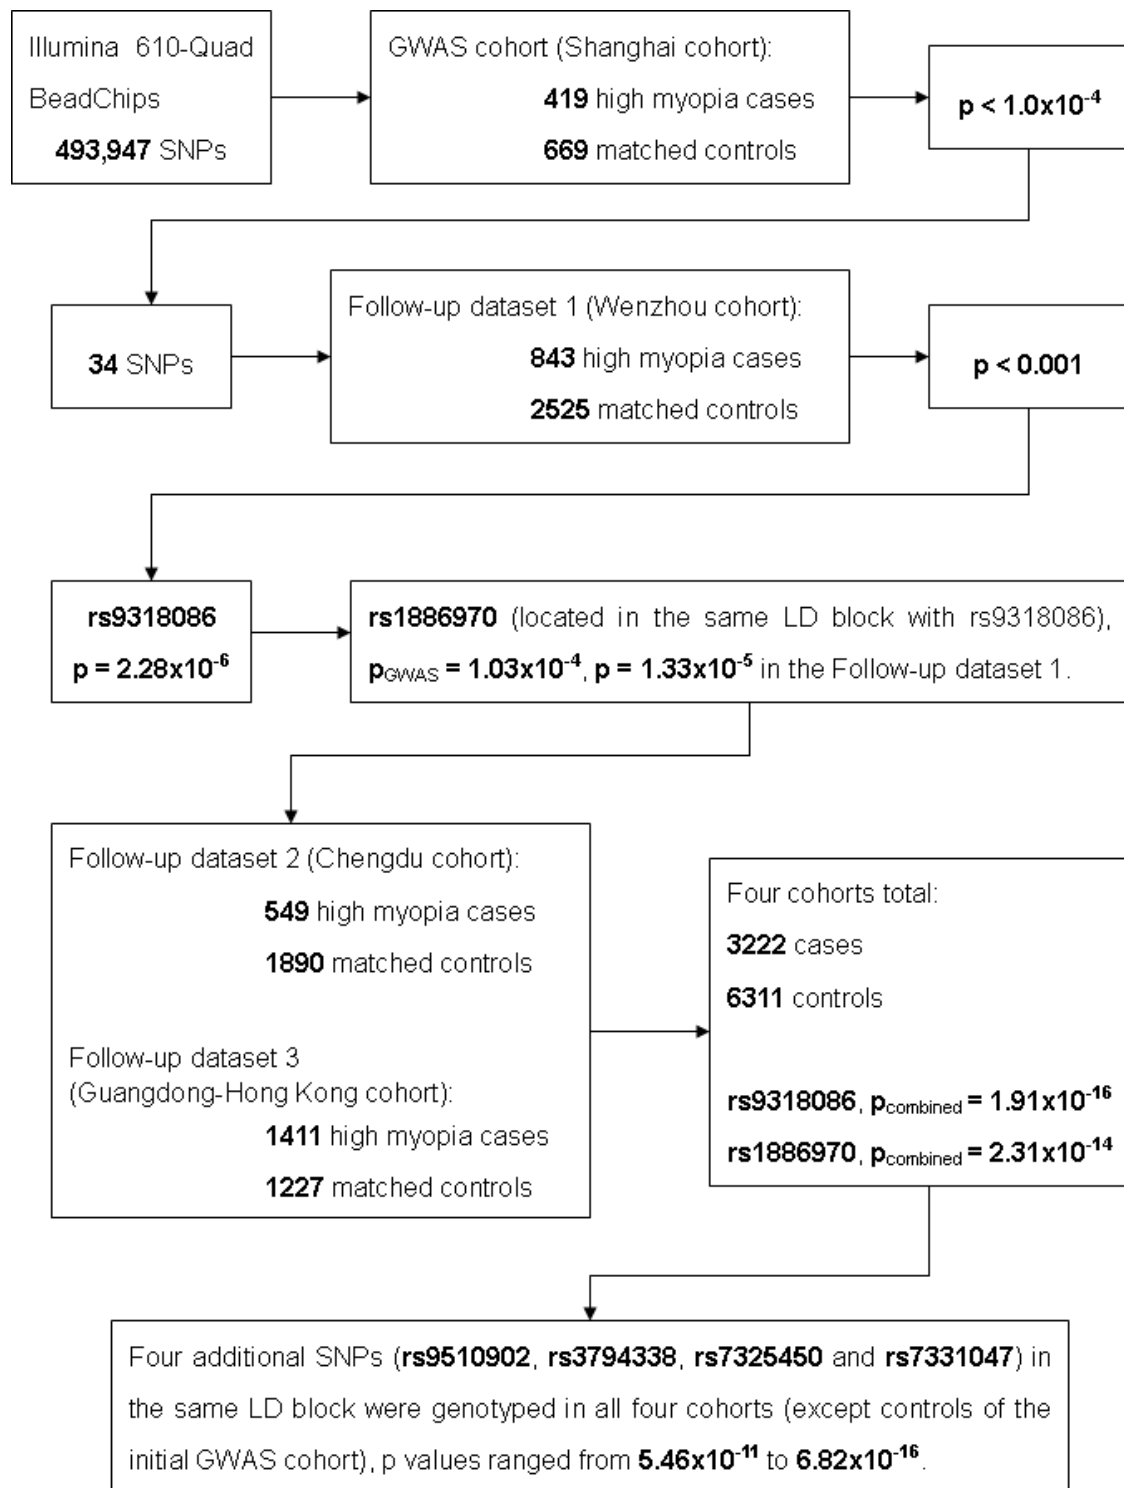

**Figure S1. Flow chart of experimental work.**

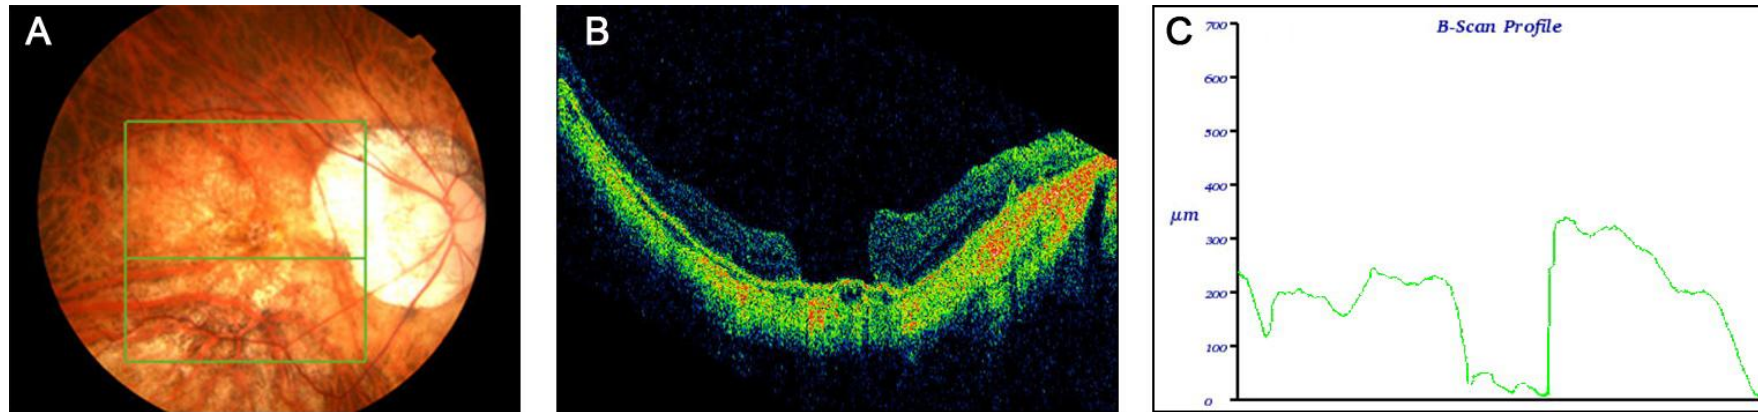

**Figure S2. Fundus appearance and OCT of a patient with high myopia.** The patient was a 57-year-old male. The refractive error of the left eye was -11.00 diopter sphere. **(A)**. The fundus photograph of the left eye of the patient presented a tigroid or tessellated appearance, circum papillary choriocapillary atrophy, and a macular hole. A Macular hole was also clearly observed in macular region in the OCT test **(B)**, indicating that the RPE layer is very thin at the hole region **(C)**.

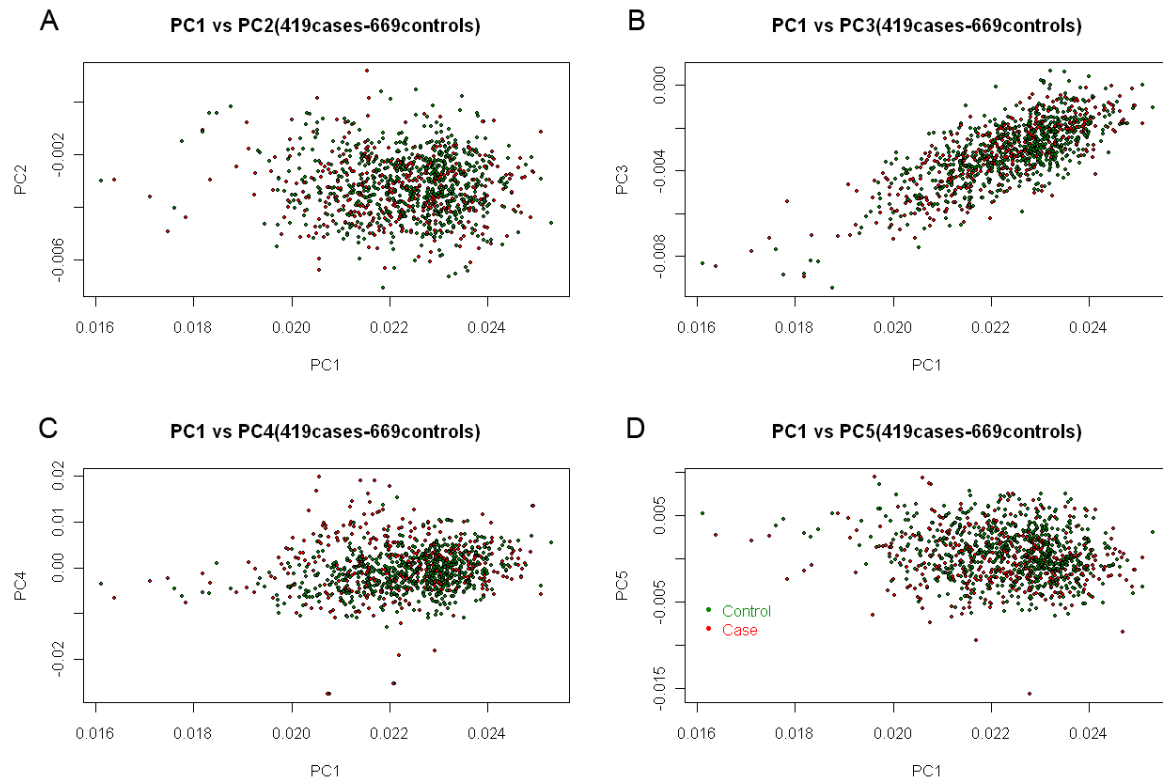

**Figure S3. Plots of the first five principal components from the principal components analysis using 1088 participant samples (419 cases, 669 controls).** The red points are cases and the green points are controls. **A.** PCA plot of the first and second components; **B.** plot of the first and third components; **C.** plot of the first and fourth components; and **D.** plot of the first and fifth components.

**Table S1. Loci with p values less than  $1.0 \times 10^{-4}$  at GWAS and their follow-up studies in the follow-up dataset 1.**

| CHR | SNP        | Position  | Allele | GWAS dataset (SH) <sup>a</sup> |         |          | Follow-up dataset 1 (WZ) <sup>a</sup> |         |          | Gene_symbol      | Location      |
|-----|------------|-----------|--------|--------------------------------|---------|----------|---------------------------------------|---------|----------|------------------|---------------|
|     |            |           |        | F_A                            | F_U     | p        | F_A                                   | F_U     | p        |                  |               |
| 1   | rs2184345  | 230877734 | A      | 0.4845                         | 0.4155  | 1.64E-05 | 0.4195                                | 0.4338  | 0.5284   | <i>LOC729336</i> | flanking_5UTR |
| 1   | rs1891927  | 163404870 | A      | 0.07757                        | 0.1271  | 5.83E-05 | 0.1061                                | 0.1353  | 0.04716  | <i>LMX1A</i>     | flanking_3UTR |
| 1   | rs3752606  | 166025408 | G      | 0.06786                        | 0.1181  | 6.35E-05 | 0.1051                                | 0.1147  | 0.4996   | <i>MPZL1</i>     | 3UTR          |
| 1   | rs7523061  | 245828951 | G      | 0.4393                         | 0.5209  | 8.74E-05 | 0.4112                                | 0.3955  | 0.5122   | <i>OR2G3</i>     | flanking_5UTR |
| 1   | rs16832771 | 189027411 | A      | 0.2076                         | 0.1413  | 9.05E-05 | 0.2237                                | 0.2554  | 0.2516   | <i>FAM5C</i>     | flanking_5UTR |
| 2   | rs4662459  | 146800145 | G      | 0.4179                         | 0.3326  | 5.84E-06 | 0.3669                                | 0.3353  | 0.1522   | <i>PABPC1P2</i>  | flanking_5UTR |
| 2   | rs6719401  | 238500934 | A      | 0.07197                        | 0.01732 | 1.96E-05 | 0.01427                               | 0.01618 | 0.7317   | <i>RAMP1</i>     | flanking_3UTR |
| 3   | rs3887345  | 75886161  | G      | 0.42                           | 0.5135  | 5.12E-05 | 0.4788                                | 0.4635  | 0.5333   | <i>NULL</i>      | flanking_5UTR |
| 3   | rs6549245  | 69788306  | G      | 0.3043                         | 0.3752  | 9.90E-05 | 0.3701                                | 0.3706  | 0.9827   | <i>MITF</i>      | flanking_5UTR |
| 4   | rs16995877 | 33517230  | A      | 0.1103                         | 0.04795 | 5.97E-07 | 0.1191                                | 0.1132  | 0.6903   | <i>RPL31P31</i>  | flanking_5UTR |
| 4   | rs6823909  | 158547155 | A      | 0.1849                         | 0.1037  | 4.28E-06 | 0.1728                                | 0.1632  | 0.5823   | <i>GRIA2</i>     | flanking_3UTR |
| 5   | rs1353492  | 92471800  | A      | 0.235                          | 0.2882  | 6.80E-05 | 0.2996                                | 0.3083  | 0.6839   | <i>POLD2P1</i>   | flanking_5UTR |
| 5   | rs730870   | 125902892 | G      | 0.4143                         | 0.4903  | 8.79E-05 | 0.4292                                | 0.425   | 0.853    | <i>ALDH7A1</i>   | flanking_3UTR |
| 6   | rs2181938  | 23824132  | G      | 0.2927                         | 0.2163  | 6.65E-05 | 0.2461                                | 0.2368  | 0.6369   | <i>NRSN1</i>     | flanking_5UTR |
| 8   | rs7003102  | 126372675 | G      | 0.1065                         | 0.1737  | 3.46E-06 | 0.1478                                | 0.1206  | 0.08827  | <i>NSMCE2</i>    | intron        |
| 8   | rs1979221  | 126689885 | G      | 0.331                          | 0.2511  | 1.07E-05 | 0.3077                                | 0.3118  | 0.8483   | <i>TRIB1</i>     | flanking_3UTR |
| 8   | rs4870938  | 126421004 | A      | 0.1036                         | 0.1644  | 3.13E-05 | 0.1338                                | 0.1176  | 0.2951   | <i>NSMCE2</i>    | intron        |
| 10  | rs7899695  | 94419074  | G      | 0.04317                        | 0.01149 | 8.30E-06 | 0.06126                               | 0.05588 | 0.6222   | <i>KIF11</i>     | flanking_3UTR |
| 13  | rs6561323  | 46083602  | A      | 0.0631                         | 0.1054  | 3.41E-05 | 0.09486                               | 0.07396 | 0.1114   | <i>LRCH1</i>     | intron        |
| 13  | rs6561321  | 46059561  | C      | 0.06548                        | 0.1061  | 7.60E-05 | 0.09221                               | 0.07647 | 0.2262   | <i>LRCH1</i>     | intron        |
| 13  | rs9316222  | 46112691  | A      | 0.07262                        | 0.1173  | 8.12E-05 | 0.09363                               | 0.075   | 0.1532   | <i>LRCH1</i>     | intron        |
| 13  | rs9318086  | 23330467  | A      | 0.5143                         | 0.4469  | 8.14E-05 | 0.4987                                | 0.4327  | 2.28E-06 | <i>MIPEP</i>     | intron        |

|    |            |          |   |         |         |          |        |         |        |                  |               |
|----|------------|----------|---|---------|---------|----------|--------|---------|--------|------------------|---------------|
| 16 | rs9923450  | 9009889  | A | 0.3595  | 0.4425  | 5.97E-05 | 0.414  | 0.4015  | 0.5794 | <i>LOC729913</i> | intron        |
| 16 | rs462407   | 82380105 | A | 0.07279 | 0.1233  | 7.29E-05 | 0.1054 | 0.1162  | 0.4512 | <i>CDH13</i>     | intron        |
| 17 | rs7946     | 17350285 | A | 0.2405  | 0.1794  | 5.64E-05 | 0.1726 | 0.1721  | 0.9754 | <i>PEMT</i>      | coding        |
| 18 | rs10514157 | 70994152 | A | 0.3294  | 0.2549  | 7.49E-05 | 0.3112 | 0.3     | 0.5984 | <i>ZADH2</i>     | flanking_3UTR |
| 19 | rs285680   | 38969526 | C | 0.2488  | 0.1647  | 7.16E-06 | 0.2322 | 0.2544  | 0.2571 | <i>KCTD15</i>    | flanking_5UTR |
| 20 | rs6066502  | 45911998 | C | 0.4381  | 0.3617  | 1.96E-05 | 0.389  | 0.3897  | 0.9761 | <i>SULF2</i>     | flanking_5UTR |
| 20 | rs6122616  | 45872639 | G | 0.1869  | 0.2511  | 6.32E-05 | 0.2165 | 0.2059  | 0.573  | <i>SULF2</i>     | flanking_5UTR |
| 22 | rs3827410  | 45258351 | C | 0.06905 | 0.03064 | 9.86E-06 | 0.0461 | 0.05735 | 0.2602 | <i>CELSR1</i>    | intron        |
| 22 | rs9628484  | 47538566 | A | 0.07194 | 0.119   | 3.24E-05 | 0.1017 | 0.09706 | 0.7376 | <i>FAM19A5</i>   | flanking_3UTR |
| 22 | rs13057753 | 47541323 | A | 0.07399 | 0.1203  | 6.35E-05 | 0.1039 | 0.09706 | 0.7376 | <i>FAM19A5</i>   | flanking_3UTR |
| 22 | rs1077166  | 43489769 | G | 0.2917  | 0.3475  | 8.40E-05 | 0.3149 | 0.3294  | 0.5011 | <i>PRR5</i>      | intron        |
| 22 | rs131021   | 47559621 | G | 0.07775 | 0.1218  | 9.13E-05 | 0.1034 | 0.1059  | 0.8602 | <i>FAM19A5</i>   | flanking_3UTR |

<sup>a</sup>GWAS, genome-wide association study; GWAS dataset, Shanghai cohort; Follow-up dataset 1, Wenzhou cohort; F\_A, the allele frequency of the affected patients; F\_U, the allele frequency of the unaffected controls; The p value was corrected by age and gender.

**Table S2. SNPs associated with high myopia at 13q12.12 from GWAS.**

| SNP       | Position (Chr.13) | Allele | F_A <sup>a</sup> | F_U <sup>b</sup> | p <sup>c</sup>        | OR <sup>d</sup> | Gene_symbol                   |
|-----------|-------------------|--------|------------------|------------------|-----------------------|-----------------|-------------------------------|
| rs2861537 | 23204049          | A      | 0.4405           | 0.4043           | 0.027                 | 1.239           | intron 18 ( <i>MIPEP</i> )    |
| rs1536299 | 23216963          | C      | 0.4405           | 0.4051           | 0.028                 | 1.238           | intron 18 ( <i>MIPEP</i> )    |
| rs4770489 | 23224754          | G      | 0.356            | 0.3954           | 0.014                 | 0.783           | intron 17 ( <i>MIPEP</i> )    |
| rs7319884 | 23285412          | A      | 0.327            | 0.3617           | 0.026                 | 0.799           | intron 14 ( <i>MIPEP</i> )    |
| rs9318086 | 23330467          | A      | 0.5143           | 0.4469           | 8.14X10 <sup>-5</sup> | 1.471           | intron 10 ( <i>MIPEP</i> )    |
| rs1886970 | 23338498          | G      | 0.5155           | 0.4507           | 1.03X10 <sup>-4</sup> | 1.462           | intron 7 ( <i>MIPEP</i> )     |
| rs1977381 | 23368554          | A      | 0.5024           | 0.4419           | 3.60X10 <sup>-4</sup> | 1.417           | intron 1 ( <i>C1QTNF9B</i> )  |
| rs716608  | 23374045          | A      | 0.5324           | 0.467            | 1.47X10 <sup>-4</sup> | 1.444           | downstream of <i>C1QTNF9B</i> |
| rs2077709 | 23374073          | A      | 0.531            | 0.4678           | 1.79X10 <sup>-4</sup> | 1.437           | downstream of <i>C1QTNF9B</i> |

<sup>a</sup>F\_A, the allele frequency of the affected patients; <sup>b</sup>F\_U, the allele frequency of the unaffected controls; <sup>c</sup>The p value was corrected by age, gender and genomic control; <sup>d</sup>OR, odds ratio.

**Table S3. Primers for genotyping by the SNaPshot method**

| <b>SNP</b> | <b>PCR primers</b>                                           | <b>SNaP shot primer</b>                            |
|------------|--------------------------------------------------------------|----------------------------------------------------|
| rs9510902  | Forward: GAGGGTCCAGAATGTTTGT<br>Reverse: CCTCCCTGGTTTGTCTTAC | CACAGGCTGTTAAGCACAGC                               |
| rs3794338  | Forward: GTCCTTATTTTACTTC<br>Reverse: GCTTCTTGCTTAGATTTAG    | ACCTACCCCAGAATCTGGGGAAAAGA                         |
| rs1886970  | Forward: AGGGAGGTGGAAAGTGAT<br>Reverse: TGGCATTGTTTTGTCTGT   | TGTATTGGCAGGGGGCTGTTGTGCACATCATC                   |
| rs7331047  | Forward: GTGCCAGGTTTCCATTCT<br>Reverse: GATGGGTTGGGATGTAGTC  | TCACCTACGGAAGTGGGGTGATAAACTACCTAGTGTC              |
| rs9318086  | Forward: CAACCTTAACTCTCCTACTT<br>Reverse: CGCTCTTATGTTTTCTCA | AATAAACACAGGAGGATATAGAAGCCAGAGGAGTACTTCTGTCA       |
| rs7325450  | Forward: GTCAGGGCTCACATTAGA<br>Reverse: GCAGCAAGGTTTCTGTAG   | AGGAGGTTTTTAGAGGATGTCACGACTAGGGTTGAGTGTCAGTTAATCTG |



**Table S4. Primers for gene expression by RT-PCR.**

| <b>Gene name</b>    | <b>Gene id</b> | <b>Primer sequences</b>                                        | <b>Product length</b> |
|---------------------|----------------|----------------------------------------------------------------|-----------------------|
| <i>MIPEP</i>        | NM_005932.3    | Forward: CTCCACGCAGAATCACCA<br>Reverse: TCCCTCGTATCATCTCAAAA   | 272                   |
| <i>C1QTNF9B</i>     | NM_001007537.1 | Forward: TGCTTGCCATTGAAATCTGC<br>Reverse: TCTCCACTCGTCCCATCCTT | 196                   |
| <i>C1QTNF9B-AS1</i> | NM_001135816.1 | Forward: ACCAAAGACACCTGAACATT<br>Reverse: TAAGAGGCTGGAAAGGAGAT | 181                   |
| <i>GAPDH</i>        | NM_002046.3    | Forward: GAAGGTGAAGGTCGGAGTC<br>Reverse: GAAGATGGTGATGGGATTTTC | 226                   |

**TableS 5. GWAS Results in this study of previous identified myopia associated SNPs by GWASs.**

| Gene                         | Location | SNP        | Sample Size | Ethnicity                    | p        | Reference                                        | Minor Allele | GWAS data in this study |        |         |         |        |
|------------------------------|----------|------------|-------------|------------------------------|----------|--------------------------------------------------|--------------|-------------------------|--------|---------|---------|--------|
|                              |          |            |             |                              |          |                                                  |              | F_A                     | F_U    | CHISQ   | p       | OR     |
| <i>CTNND2</i>                | 5p15     | rs6885224  | 4153        | Singapore Chinese & Japanese | 7.84E-06 | Li YJ, et al. Ophthalmology. 2010 Nov 20.        | G            | 0.2124                  | 0.2003 | 0.4638  | 0.4958  | 1.077  |
|                              |          | rs12716080 | 4155        |                              | 1.05E-05 |                                                  | C            | 0.2255                  | 0.2175 | 0.1941  | 0.6595  | 1.048  |
| <i>BLID &amp; MIR100HG</i>   | 11q24.1  | rs10892819 | 2741        | Japanese                     | 0.04     | Hideo Nakanishi, et al. PLoS Genet. 2009 Sep 25. | C            | 0.2368                  | 0.2571 | 1.128   | 0.2882  | 0.8968 |
|                              |          | rs577948   |             |                              | 2.22E-07 |                                                  | A            | 0.5012                  | 0.4888 | 0.3172  | 0.5733  | 1.051  |
|                              |          | rs11218553 |             |                              | 8.28E-03 |                                                  | G            | 0.3067                  | 0.3154 | 0.1822  | 0.6695  | 0.9602 |
|                              |          | rs11218544 |             |                              | 5.48E-06 |                                                  | C            | 0.4069                  | 0.4111 | 0.03652 | 0.8484  | 0.983  |
| <i>RASGRF1</i>               | 15q25    | rs939661   | 14105       | European                     | 3.85E-09 | Pirro G Hysi, et al. Nat Genet. 2010 Sep 12.     | G            | 0.3592                  | 0.4103 | 5.658   | 0.01738 | 0.8056 |
|                              |          | rs8027411  |             |                              | 2.07E-09 |                                                  | C            | 0.3974                  | 0.4544 | 4.358   | 0.03680 | 0.817  |
| near <i>GJD2 &amp; ACTC1</i> | 15q14    | rs560766   | 15608       | European                     | 2.49E-11 | Abbas M Solouki, et al. Nat Genet. 2010 Sep 12.  | A            | 0.4486                  | 0.4275 | 0.9283  | 0.3353  | 1.089  |
|                              |          | rs580839   |             |                              | 2.53E-11 |                                                  | A            | 0.4462                  | 0.4279 | 0.6909  | 0.4058  | 1.077  |
